# Supplementary material for: Profiling Ribonucleotide and Deoxyribonucleotide Pools Perturbed by Remdesivir in Human Bronchial Epithelial Cells
Source: Front Pharmacol. 2021 May 4;12:647280. doi: 10.3389/fphar.2021.647280 (PMC8120990; doi:10.3389/fphar.2021.647280)
Supplement: Supplementary file 2 [file datasheet2.xlsx]

## Sheet: Sheet1
	Table 1. Levels of RNs in Beas-2B cells before and after incubation with remdesivir ( pmol/106 cell).								Table 2. Levels of dRNs in Beas-2B cells before and after incubation with remdesivir ( pmol/106 cell).
		Control-12 h	10 μM-12 h	Control-24 h	10 μM-24 h	Control-48 h	10 μM-48 h			Control-12 h	10 μM-12 h	Control-24 h	10 μM-24 h	Control-48 h	10 μM-48 h
	ATP	3930.96	3369.56	2543.07	4964.07	2743.89	4907.82		dATP	6.43148	19.6449	8.46674	15.1797	4.08718	5.21233
		4366.56	3185.85	2997.63	5023.63	4154.76	2460.43			11.9869	9.48584	12.9535	10.0776	9.49282	3.37513
		2869.48	3547.03	3075.63	3601.02	4672.49	3124.8			11.7814	9.54084	6.96174	6.37136	6.36479	7.55292
		3800.48	3314.66	3257.75	7969.55	4488.08	2699.79			7.11783	7.67649	9.59198	9.58686	5.89533	9.52616
		4273.37	3419	3586.14	4949.99	6190.36	2069.66			14.7919	7.17099	11.2929	27.0887	9.73452	3.64471
	Mean±SD	3848.2±532.3	3367.2±118.9	3092±341.2	5301.7±1437	4449.9±1102.5	3052.5±988.8		Mean±SD	10.4±3.2	10.7±4.6	9.9±2.1	13.7±7.3	7.1±2.2	5.9±2.4
	P-value				*				P-value
	ADP	348.463	399.367	185.216	321.213	241.265	327.209		dADP	13.7855	22.6497	7.88729	15.7843	10.2994	20.8996
		481.386	337.062	166.406	249.677	260.955	160.231			7.71332	13.8503	9.51491	17.7778	11.2049	9.74279
		274.093	350.267	207.54	239.05	278.591	135.719			17.7898	9.72605	17.0953	47.5707	18.0338	16.5182
		293.104	280.824	284.768	365.656	282.759	111.182			12.7676	16.4901	11.852	16.9646	14.8806	14.2792
		418.605	222.862	264.332	301.84	344.115	162.227			16.1184	10.8518	23.8693	31.6137	10.0913	5.64459
	Mean±SD	363.1±77.6	318.1±60.8	221.7±45.6	295.5±46.7	281.5±34.6	179.3±76.3		Mean±SD	13.6±3.4	14.7±4.6	14±5.8	25.9±12.3	12.9±3.1	13.4±5.3
	P-value						*		P-value
	AMP	131.282	191.33	44.7446	173.637	127.02	165.232		dAMP	9.62024	8.39019	3.65346	11.2497	4.43147	5.65895
		115.447	156.424	51.9189	129.78	160.292	121.045			19.2243	9.30248	4.75797	9.30796	4.93804	5.71467
		100.574	212.19	63.9694	135.271	166.588	126.251			7.61499	14.3603	4.27578	8.71105	7.69878	4.62858
		190.29	118.156	85.2106	205.175	178.38	93.2262			7.02608	6.93343	4.90326	14.5812	6.0065	4.66531
		142.424	133.994	79.1191	164.643	178.691	82.6425			13.1355	7.11924	5.29958	16.1664	9.46982	2.48046
	Mean±SD	136±30.6	162.4±35	65±15.4	161.7±27.4	162.2±18.9	117.7±28.9		Mean±SD	11.3±4.5	9.2±2.7	4.6±0.6	12±2.9	6.5±1.9	4.6±1.2
	P-value				**		*		P-value				**
	GTP	1011.52	1538.27	841.853	2023.25	792.512	1339.06		dGTP	5.924	5.79062	2.72413	6.09477	2.90386	4.56055
		1739.29	1083.52	747.951	1627.69	1408.64	1090.3			9.46098	6.79577	1.73368	3.80004	5.71171	9.50765
		859.744	1342.93	703.854	1616.54	1324.77	1592.07			3.08878	4.5236	1.98298	4.84119	5.29403	7.57614
		831.08	890.35	1004.29	2690.93	1581.42	1108.6			7.68717	4.62055	1.38922	5.21464	5.59443	4.24965
		1357.67	1581.69	873.478	2386.57	1586.47	1141.29			4.51338	1.75728	3.35809	8.74334	5.30886
	Mean±SD	1159.9±345	1287.4±265.3	834.3±104.8	2069±421.7	1338.8±291.1	1254.3±190.9		Mean±SD	6.1±2.3	4.7±1.7	2.2±0.7	5.7±1.7	5±1	6.5±2.2
	P-value				**				P-value				**
	GDP	41.8304	35.4623	35.7594	69.6359	34.7648	43.1617		dGDP	3.81289	3.48804	2.16266	4.22702	1.95739	4.51377
		50.1807	38.5054	34.5431	54.3275	35.5776	28.4263			5.08376	3.13947	1.73837	4.18955	1.10105	1.88032
		27.4668	40.331	47.441	53.9027	42.5961	32.4908			2.20416	4.26703	2.26523	3.66802	3.32985	1.79995
		38.9444	42.6628	43.0823	104.533	39.9252	28.8241			4.36335	2.20171	3.76469	5.24165	3.64476	3.1598
		44.9496	33.7605	51.4211	90.3566	48.6828	26.0012			3.70923	2.01967	1.78685	8.81522	4.92866	4.32323
	Mean±SD	40.7±7.6	38.1±3.2	42.4±6.5	74.6±20	40.3±5.1	31.8±6.1		Mean±SD	3.8±1	3±0.8	2.3±0.7	5.2±1.9	3±1.3	3.1±1.2
	P-value				*				P-value				*
	GMP	11.8899	9.13311	8.77503	14.7357	11.7722	17.0039		dGMP	3.22451	0.541046	0.857288	2.09397	3.46445	2.41694
		13.6831	11.741	5.15697	9.54597	12.0245	12.4038			1.98397	1.09127	1.40361	0.947306	1.80533	0.26328
		9.49106	11.0033	6.85734	13.3908	12.7868	11.6631			1.14215	1.73512	0.650486	0.810264	2.66783	0.555279
		13.9652	11.4438	10.2817	11.6442	14.1001	6.43548			1.98871	1.05173	1.152	1.89988	3.19709	0.850846
		12.8451	10.4802	9.79193	20.777	22.0433	9.69944			2.59319	2.18845	0.924834	1.28992	4.50615	1.03678
	Mean±SD	12.4±1.6	10.8±0.9	8.2±1.9	14±3.8	14.5±3.8	11.4±3.5		Mean±SD	2.2±0.7	1.3±0.6	1±0.3	1.4±0.5	3.1±0.9	1±0.7
	P-value				*				P-value						**
	CTP	970.58	933.338	1556.85	1491.3	498.018	739.04		dCTP	4.0176	5.62369	2.31001	6.71039	2.38916	5.13247
		1593.14	1107.38	1612.15	883.243	1247.28	956.961			6.80133	3.02275	4.05614	8.04109	6.04093	6.79262
		941.783	762.582	2037.61	1325.21	1448.37	608.981			5.32647	8.48949	1.59534	7.40845	4.48228	10.5739
		1114.08	596.504	1611.17	1001.85	1407.71	665.803			2.70904	1.04143	2.85489	6.03197	4.07295	3.63261
		1274.37	783.86	1954.57	1561.98	1902.72	860.225			8.16842	1.32625	2.1454	5.2071	9.41219	11.6226
	Mean±SD	1178.8±238.6	836.7±172.4	1754.5±200	1252.7±267.3	1300.8±456.7	766.2±127.1		Mean±SD	5.4±1.9	3.9±2.8	2.6±0.8	6.7±1	5.3±2.4	7.6±3.1
	P-value		*		*				P-value				**
	CDP	35.9097	35.9689	41.8117	50.0601	26.2636	30.7902		dCDP	3.36739	1.53464	3.27704	11.0498	3.0335	8.59969
		37.4136	40.5436	35.5645	39.9214	49.7598	27.2027			1.8541	2.43251	4.8978	3.37833	6.6752	5.62465
		25.1214	34.2393	47.5069	47.7098	58.7912	20.3217			2.38904	2.15361	5.36829	6.55509	6.66097	4.65646
		33.1858	27.6975	45.6632	42.3553	53.3535	25.1783			1.60874	2.61495	4.54394	7.10377	3.89255	3.27703
		42.5316	29.775	62.3844	65.1847	100.546	61.4389			3.56518	1.56222	5.08694	6.81938	2.06097	3.17369
	Mean±SD	34.8±5.7	33.6±4.6	46.6±8.9	49±8.8	57.7±24.1	33±14.6		Mean±SD	2.6±0.8	2.1±0.4	4.6±0.7	7±2.4	4.5±1.9	5.1±2
	P-value								P-value
	CMP	8.16569	10.5863	3.05896	16.7346	20.1225	21.3522		dCMP	4.03983	2.73523	2.74482	7.07332	3.41527	8.06684
		15.9055	8.71298	3.4976	11.9763	23.1887	14.3856			1.95516	2.65539	1.58301	3.63474	8.60244	5.89179
		7.05379	11.3106	4.38114	13.2908	22.0227	13.6912			2.04122	4.16935	2.32047	5.58467	9.58528	8.49207
		6.40942	7.01433	6.34757	21.4465	23.2524	11.9243			3.01924	3.12821	2.74932	4.60528	11.0828	3.98631
		11.5949	5.47366	6.10357	14.5244	15.4498	8.79539			1.42303	2.12021	4.06162	6.04037	13.4031	1.66112
	Mean±SD	9.8±3.5	8.6±2.2	4.7±1.3	15.6±3.3	20.8±2.9	14±4.1		Mean±SD	2.5±0.9	3±0.7	2.7±0.8	5.4±1.2	9.2±3.3	5.6±2.6
	P-value				**		*		P-value				**
	UTP	2278.24	2477.93	2026.56	3991.51	1390.26	5102.94		TTP	99.5991	78.6744	45.3022	82.4822	66.3399	50.2586
		2286.91	2202.31	3161.64	3940.04	4384.68	2448.51			81.5585	67.7346	41.1828	76.9963	142.265	38.8334
		2025.53	2057.78	1812.19	2222.05	4881.85	1718.1			77.4942	65.154	48.2408	74.2266	174.981	18.7583
		1113.04	1789.84	2394.24	2475.18	4865.12	984.217			73.0922	88.8074	57.0785	97.1701	153.807	20.0973
		2920.36	1322.49	2299.49	4377.14	4420.09	3060.88			92.9461	65.3061	55.4485	129.599	247.898	35.1876
	Mean±SD	2124.8±585.9	1970.1±392.8	2338.8±459.7	3401.2±876.3	3988.4±1316.1	2662.9±1404.9		Mean±SD	84.9±9.9	73.1±9.3	49.5±6	92.1±20.4	157.1±58.4	32.6±11.9
	P-value								P-value				*		**
	UDP	157.65	330.007	187.094	223.28	110.831	343.468		TDP	49.4828	45.5337	21.2041	39.834	36.6045	40.6582
		330.026	288.392	164.024	157.636	257.645	241.207			53.6283	41.3443	21.7146	38.8133	67.8953	29.0368
		127.563	289.936	192.57	191.179	289.183	147.898			40.5968	53.5319	24.0864	43.1936	79.0226	17.7604
		148.461	135.981	252.302	207.323	309.252	94.9217			30.7771	49.4637	31.1055	46.765	72.9206	10.2641
		309.481	127.537	234.123	321.878	440.98	312.207			57.0158	41.4783	32.0774	77.4602	88.9443	8.77635
	Mean±SD	214.6±86.6	234.4±85.1	206±32.4	220.3±55.3	281.6±105.8	227.9±94.6		Mean±SD	46.3±9.5	46.3±4.7	26±4.6	49.2±14.4	69.1±17.7	21.3±12
	P-value								P-value				*		**
	UMP	16.2949	15.9324	13.1679	27.5002	13.0204	33.4368		TMP	19.6735	20.4537	10.7807	32.6134	19.3853	38.6563
		19.5349	15.3656	12.9128	21.0301	29.4323	15.0047			22.1432	16.0036	10.1554	28.6726	27.2847	23.6496
		12.2234	16.7684	16.0554	25.5836	28.9291	18.4929			12.4586	26.1647	11.8386	31.3944	29.6646	18.4735
		13.6048	13.6071	20.8693	25.8121	33.9553	10.5722			17.2681	19.8089	14.9188	35.4828	33.2912	10.1587
		19.1961	14.8227	20.7701	38.9257	41.8677	9.46664			21.4492	15.6971	17.3427	58.204	47.4381	8.20038
	Mean±SD	16.2±2.9	15.3±1.1	16.8±3.5	27.8±6	29.4±9.4	17.4±8.6		Mean±SD	18.6±3.5	19.6±3.8	13±2.7	37.3±10.7	31.4±9.2	19.8±11
	P-value				*				P-value				**
									*p < 0.05, **p < 0.01, compared with the control group
	Energy Charge	0.930734	0.901266	0.950468	0.938771	0.920425	0.939107
		0.928247	0.911681	0.957984	0.952875	0.936458	0.92663
		0.926754	0.905749	0.949886	0.935906	0.94023	0.942685
		0.92137	0.930373	0.937263	0.954569	0.935392	0.948758
		0.927245	0.935001	0.946232	0.94174	0.947752	0.929249
	Mean±SD	0.93±0	0.92±0.01	0.95±0.01	0.94±0.01	0.94±0.01	0.94±0.01
	P-value
	*p < 0.05, **p < 0.01, compared with the control group
